# Supplementary material for: Temozolomide hydrochloride dihydrate
Source: Royal Society of Chemistry journal article supplement (doi:10.1039/c2ce26528a), 2012-11-13
Supplement: c2ce26528a.pdf [file c2ce26528a.pdf]

## Temozolomide hydrochloride dihydrate†

N. Jagadeesh Babu,<sup>a</sup> Palash Sanphui,<sup>a</sup> Naba K. Nath,<sup>a</sup> U. B. Rao Khandavilli,<sup>b</sup> and  
Ashwini Nangia<sup>\*a,b</sup>

<sup>a</sup> School of Chemistry

<sup>b</sup> Technology Business Incubator

University of Hyderabad, Prof. C.R. Rao Road, Gachibowli, Central University PO,  
Hyderabad 500 046, India.

E-mail: ashwini.nangia@gmail.com

### Electronic Supplementary Information†

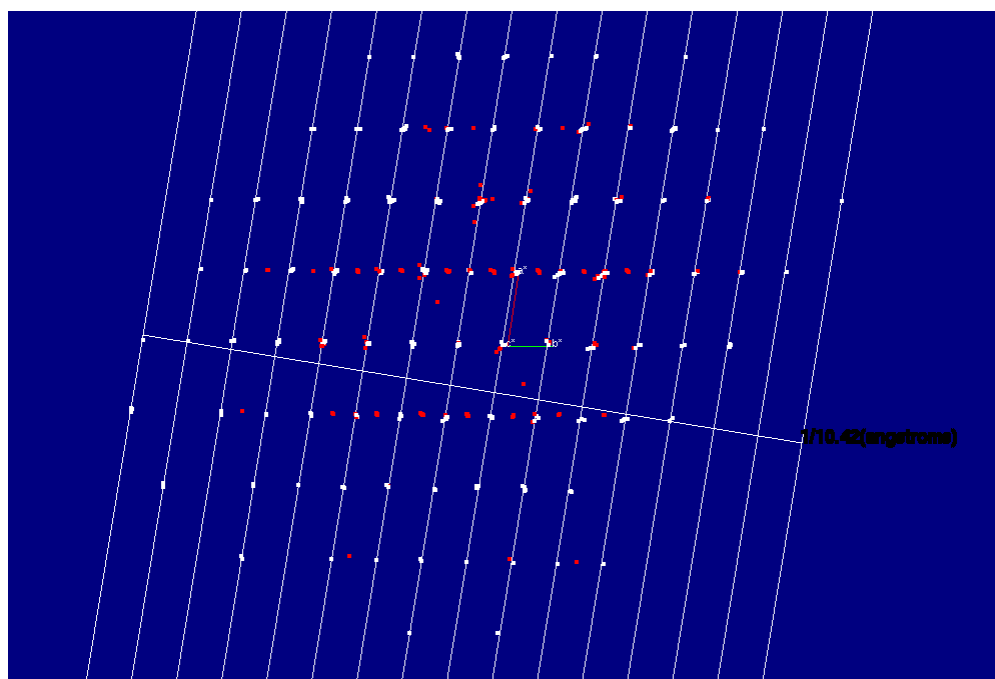

**Figure S1** (a) Visualization of reflections in RLATT along  $a^*b^*$  plane. Reflections are color coded. Major (white) and Twin (red)

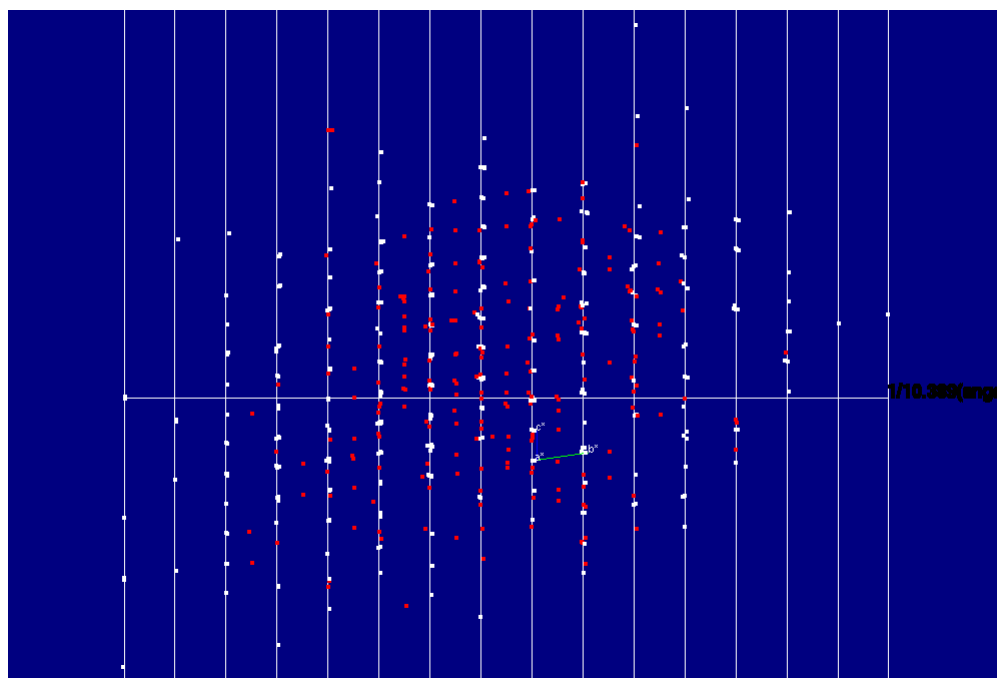

**Figure S1** (b) Visualization of reflections in RLATT along  $a^*c^*$  plane. This figure shows the many twinned spots.

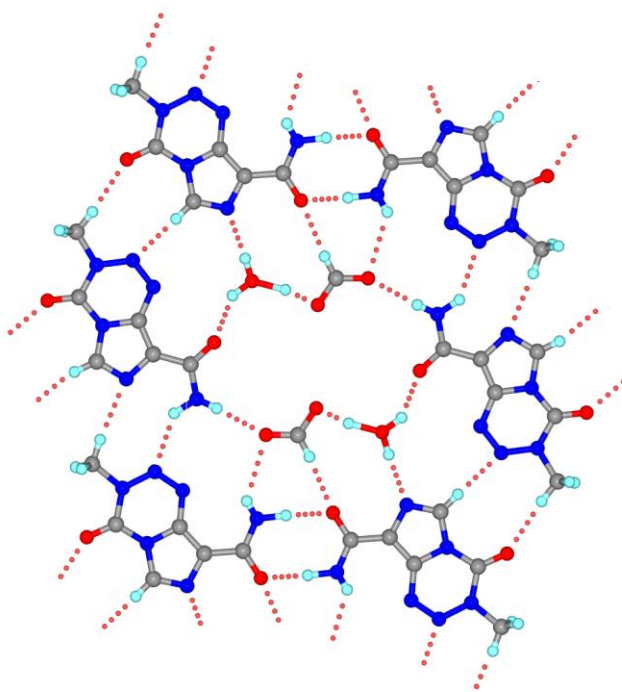

**Figure S2** Crystal structure of temozolomide–formic acid monohydrate (2:1:1). Temozolomide exists in conformations A and B and are connected by amide dimer  $R_2^2(8)$  synthon. The proton from formic acid is migrated to water forming a hydronium cation and a formate anion, and these two are linked by  $O-H\cdots O$  hydrogen bonds. The imidazole N of TMZ is participates in  $N-H\cdots O$  and  $C-H\cdots O$  interactions.

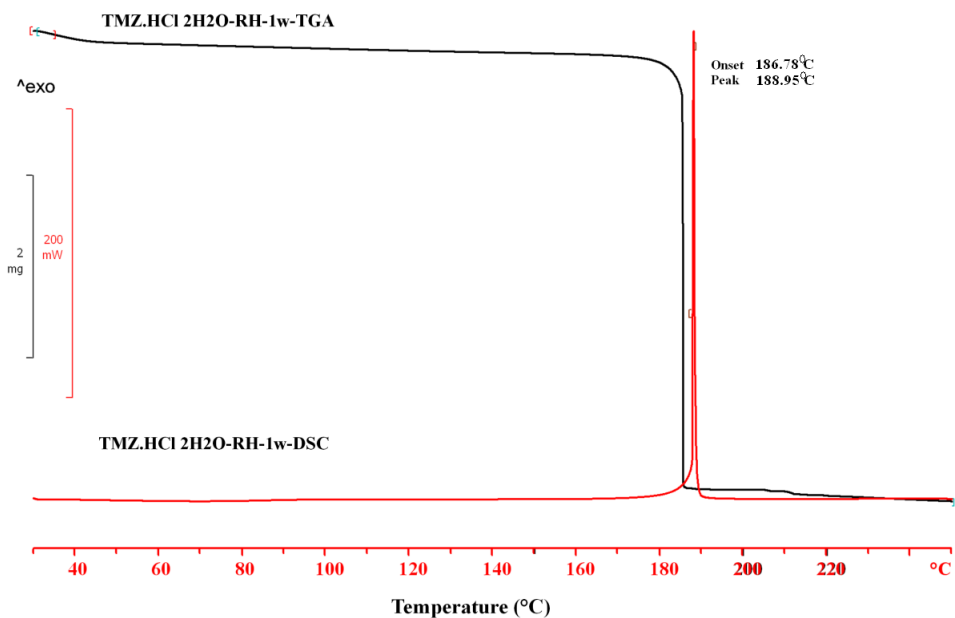

**Figure S3** DSC and TGA comparisons of TMZ.HCl dihydrate after keeping the sample in accelerated stability chamber for 1 week gave PXRD pattern that matched with that of neutral temozolomide form 1 (commercial material). The product material has no water (TGA) and shows sharp melting endotherm at 189 °C (DSC). The melting point of pure temozolomide is 194 °C (sharp endotherm in DSC).

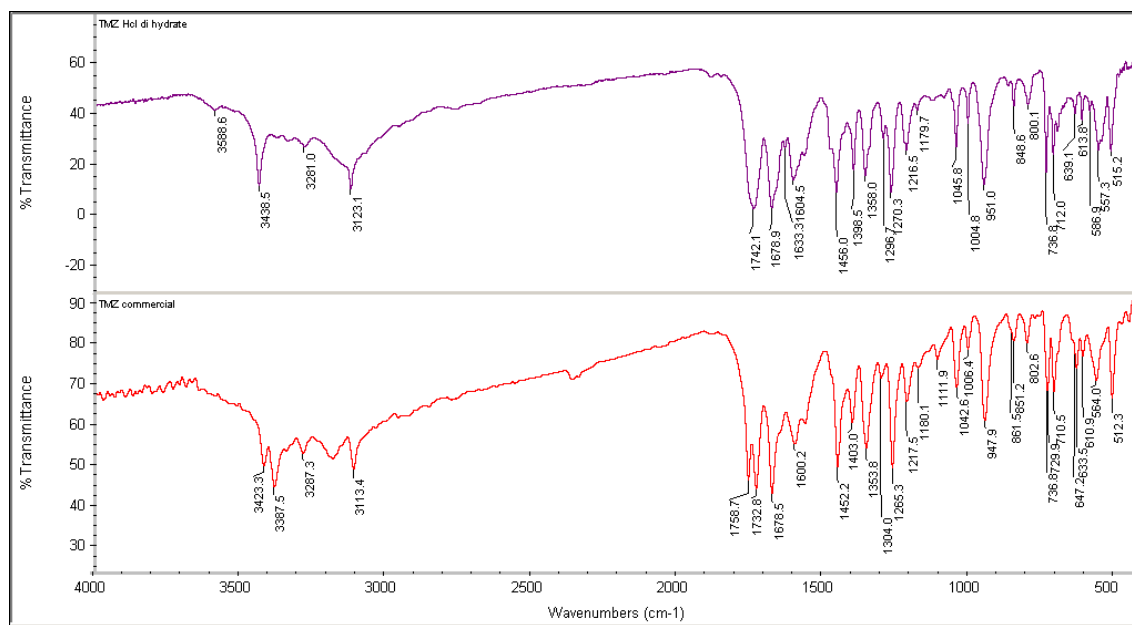

**Figure S4** IR spectra (KBr) of TMZ.HCl dihydrate and temozolomide API.
